# Supplementary material for: Benzyl salicylate from the stems and stem barks of Cornus walteri as a nephroprotective agent against cisplatin-induced apoptotic cell death in LLC-PK1 cells
Source: Royal Society of Chemistry journal article supplement (doi:10.1039/c9ra07009e), 2020-01-01
Supplement: c9ra07009e1.pdf [file c9ra07009e1.pdf]

Electronic Supplementary Information

**Benzyl salicylate from the stems and stem barks of *Cornus walteri*  
as a nephroprotective agent against cisplatin-induced apoptotic cell  
death in LLC-PK1 cells**

Dahae Lee,<sup>a</sup> Seoung Rak Lee,<sup>a</sup> Ki Sung Kang,<sup>\*b</sup> and Ki Hyun Kim<sup>\*a</sup>

---

<sup>a</sup>School of Pharmacy, Sungkyunkwan University, Suwon 440-746, Republic of Korea. E-mail:  
[khkim83@skku.edu](mailto:khkim83@skku.edu); Fax: +82-31-290-7730; Tel: +82-31-290-7700

<sup>b</sup>College of Korean Medicine, Gachon University, Seongnam 13120, Republic of Korea. E-mail:  
[kkang@gachon.ac.kr](mailto:kkang@gachon.ac.kr); Tel: +82-31-750-5402

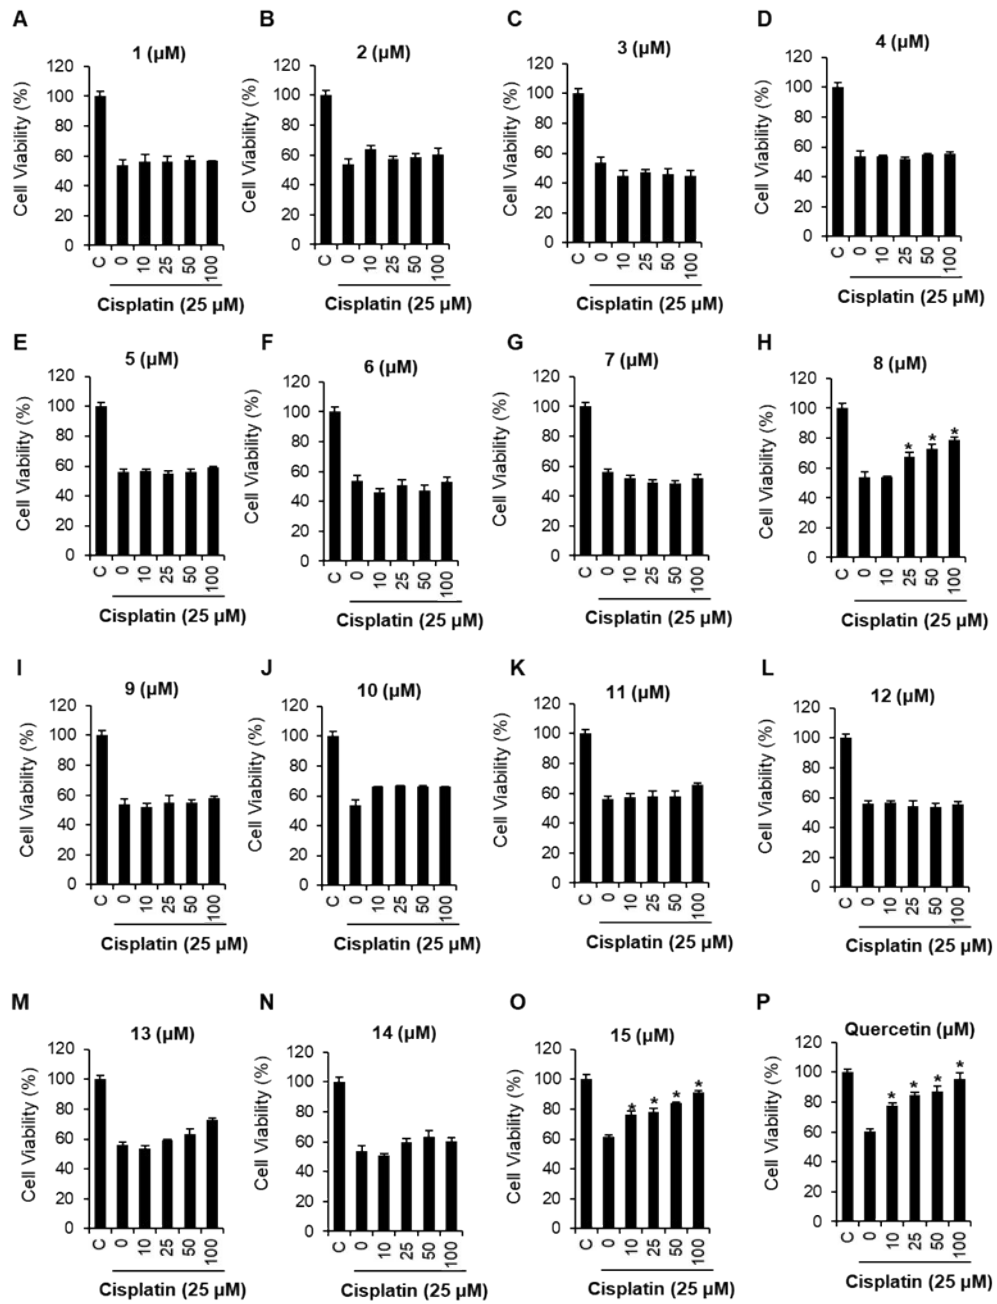

**Figure S1.** Protective effects of compounds 1-15 and quercetin (positive control) on the viability of cisplatin-damaged LLC-PK1 cells for 24 h, evaluated via the MTT assay. \*p < 0.05 vs. the cisplatin-treated cells.

There was no change in expressions of P-JNK, JNK, P-ERK, ERK, P-p38, p38, Bcl-2, Bax, cleaved caspase-3, -9, and -8 in LLC-PK1 cells with the treatment of BS alone.

---

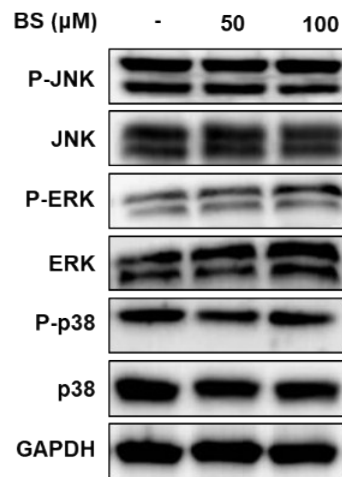

**Figure S2.** Effects of BS on the levels of p-JNK, p-p38, and p-ERK in LLC-PK1 cells. Immunoreactive bands of p-JNK, p-p38, and p-ERK detected using western blot analyses.

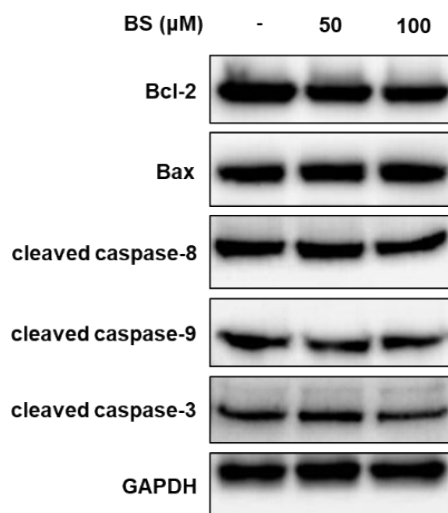

**Figure S3.** Effects of BS on the levels of Bcl-2, Bax, cleaved caspase-3, -9, and -8 in LLC-PK1 cells. Immunoreactive bands of Bcl-2, Bax, and cleaved caspase-8, -9, and -3 detected using western blot analyses.
